# Supplementary material for: Impact on the quality of life of lymphoedema patients following introduction of a hygiene and skin care regimen in a Guyanese community endemic for lymphatic filariasis: A preliminary clinical intervention study
Source: Springer Nature journal article supplement (doi:10.1186/1475-2883-2-1), 2003-01-24
Supplement: Additional file 1 [file 1475-2883-2-1-s1.doc]

**Additional file 1**

| DERMATOLOGY LIFE QUALITY INDEX |  |  |
| --- | --- | --- |
|  |  |  |
| **The aim of these questions is to measure how much your skin problem has affected your life OVER THE LAST WEEK. Please tick one box for each question.** |  |  |
|  |  |  |
|  |  |  |
| **1.** Over the last week how itchy, sore, painful, or stinging has your skin been? | Very Much |  |
|  | A lot |  |
|  | A little |  |
|  | Not at all |  |
|  |  |  |
| **2.** Over the last week, how embarrassed or self conscious have you been because of your skin? | Very Much |  |
|  | A lot |  |
|  | A little |  |
|  | Not at all |  |
|  | | |
| **3.** Over the last week how much has your skin interfered with you going shopping or looking after your home and garden? | Very Much |  |
|  | A lot |  |
|  | A little |  |
|  | Not at all |  |
|  |  | Not relevant |
|  | | |
| **4.** Over the last week how much has your skin influenced the clothes that you wear? | Very Much |  |
|  | A lot |  |
|  | A little |  |
|  | Not at all |  |
|  |  | Not relevant |
|  |  |  |
| **5.** Over the last week how much has your skin affected any social or leisure activities? | Very Much |  |
|  | A lot |  |
|  | A little |  |
|  | Not at all |  |
|  |  | Not relevant |
|  |  |  |
| **6.** Over the last week has your skin prevented you from work or studying? | Yes |  |
|  | No |  |
|  |  | Not relevant |
|  |  |  |
| If NO- over the past week how much has your skin been a problem at work or studying? | A lot |  |
|  | A little |  |
|  | Not at all |  |
|  |  |  |
| **7.** Over the past week how much has your skin created problems with your partner or close friends or relatives? | Very Much |  |
|  | A lot |  |
|  | A little |  |
|  | Not at all |  |
|  |  | Not relevant |
|  |  |  |
| 8. Over the last week, how much has your skin caused any sexual difficulties? | Very Much |  |
|  | A lot |  |
|  | A little |  |
|  | Not at all |  |
|  |  | Not relevant |
|  |  |  |
| **9.** Over the last week, how much of a problem has the treatment your skin been, for example taking up time or by making your house messy? | Very Much |  |
|  | A lot |  |
|  | A little |  |
|  | Not at all |  |
|  |  | Not relevant |
|  |  |  |
| **Please check you have answered EVERY question. Thank you** |  |  |
